# Supplementary material
Source: PubMed Central journal article supplement (PMC4573713)
Supplement: MCB.00189-15_zmb999100974so1.pdf [file MCB.00189-15_zmb999100974so1.pdf]

## **Supplemental Material**

**Table S1.** Excel spreadsheet of the microarray and ribosomal profiling data used to generate the heat maps in Figure 1. Ribosomal profiling data is from Brar et al., 2012.
